# Supplementary material for: Volatile Profiles of Five Variants of Abeliophyllum distichum Flowers Using Headspace Solid-Phase Microextraction Gas Chromatography–Mass Spectrometry (HS-SPME-GC-MS) Analysis
Source: PubMed Central journal article supplement (PMC7912044; doi:10.3390/plants10020224), 2021-01-24
Supplement: plants-10-00224-s001.pdf [file plants-10-00224-s001.pdf]

## Supplementary Materials

**Volatile profiles of five variants of *Abeliophyllum distichum* flowers  
using headspace-solid phase microextraction-gas chromatography–mass spectrometry  
(HS-SPME-GC-MS) analysis**

**Yeong-Geun Lee <sup>1</sup>, Won-Sil Choi <sup>2</sup>, Seung-Ok Yang <sup>2</sup>, Jeon Hwang-Bo <sup>1</sup>, Hyoung-Geun  
Kim <sup>1</sup>, Minzhe Fang <sup>1</sup>, Tae-Hoo Yi <sup>1</sup>, Se Chan Kang <sup>1</sup>, Youn-Hyung Lee <sup>3</sup> and Nam-In  
Baek <sup>1,\*</sup>**

<sup>1</sup> Graduate School of Biotechnology and Department of Oriental Medicine Biotechnology,  
Kyung Hee University, Yongin 17104, Republic of Korea

<sup>2</sup> National Instrumentation Center for Environmental Management, Seoul National  
University, Seoul 08826, Republic of Korea

<sup>3</sup> Department of Horticultural Biotechnology, Kyung Hee University, Yongin 17104,  
Republic of Korea

\*Corresponding author

Phone: +82-31-201-2661; Fax: +82-31-204-8116

E-mail: [nibaek@khu.ac.kr](mailto:nibaek@khu.ac.kr)

## Table Legends

**Table S1.** The detected volatile components identified from the flowers in five variants of *Abeliophyllum distichum* using HS-SPME-GC/MS analysis

**Table S2.** Classification and odor note of the detected volatile components identified from the flowers in five variants of *Abeliophyllum distichum* using HS-SPME-GC/MS analysis

## Figure Legends

**Figure S1.** Representative total ion chromatograms (TIC) for raw floral tissue of five variants of *Abeliophyllum distichum*. (A) White miseon, (B) pink miseon, (C) ivory miseon, (D) blue miseon, (E) round miseon.

**Figure S2.** PCA score plot obtained from HS-SPME-GC/MS results on five variants of *Abeliophyllum distichum* flowers.

**Figure S3.** PLS-DA score plot obtained from HS-SPME-GC/MS results on five variants of *Abeliophyllum distichum* flowers.

**Table S1.** The detected volatile components identified from the flowers in five variants of *Abeliophyllum distichum* using HS-SPME-GC/MS analysis

| No | Compound                       | RT <sup>a</sup> | RRT <sup>b</sup> | LRI <sup>c</sup> | LMV <sup>d</sup> QI <sup>e</sup> | Mass fragment [ <i>m/z</i> , (Relative intensity by comparison of biggest peak)] <sup>f</sup>              |
|----|--------------------------------|-----------------|------------------|------------------|----------------------------------|------------------------------------------------------------------------------------------------------------|
| 1  | isovaleraldehyde               | 11.50           | 0.352            | 885              | 85                               | <b>58</b> 41 (100), 58 (73), 57 (73), 44 (48), 43 (44), 39 (32), 71 (16), 42 (12)                          |
| 2  | ethanol                        | 11.91           | 0.364            | 891              | 98                               | <b>45</b> 45 (100), 46 (27), 43 (17)                                                                       |
| 3  | decane                         | 15.26           | 0.467            | 1000             | 98                               | <b>57</b> 57 (100), 43 (93), 71 (76), 41 (36), 85 (31), 70 (29), 55 (19), 56 (19), 84 (17), 42 (13)        |
| 4  | 5-ethyl-2,2,3-trimethylheptane | 16.82           | 0.515            | 1040             | 85                               | <b>57</b> 57 (100), 56 (43), 71 (40), 43 (30), 41 (21), 70 (19), 55 (13), 85 (11)                          |
| 5  | <i>n</i> -hexanal              | 17.67           | 0.541            | 1061             | 91                               | <b>57</b> 41 (100), 56 (96), 43 (87), 57 (87), 44 (79), 71 (50), 55 (30), 39 (30), 72 (28), 85 (25)        |
| 6  | 2-butyl-3-octanol              | 19.22           | 0.588            | 1101             | 92                               | <b>57</b> 43 (100), 69 (97), 70 (92), 57 (79), 55 (62), 71 (57), 41 (51), 83 (35), 84 (27), 111 (25)       |
| 7  | $\beta$ -myrcene               | 20.94           | 0.641            | 1146             | 88                               | <b>93</b> 93 (100), 41 (64), 69 (62), 91 (34), 77 (18), 79 (17), 39 (15), 67 (14), 92 (13)                 |
| 8  | isoamylalcohol                 | 21.98           | 0.672            | 1174             | 91                               | <b>41</b> 41 (100), 55 (88), 57 (86), 70 (76), 56 (74), 42 (49), 43 (38), 39 (27), 45 (13)                 |
| 9  | limonene                       | 22.62           | 0.692            | 1191             | 97                               | <b>93</b> 67 (100), 68 (88), 93 (84), 79 (53), 94 (37), 92 (35), 91 (32), 121 (28), 107 (26), 77 (26)      |
| 10 | 2-hexenal                      | 22.91           | 0.701            | 1198             | 97                               | <b>41</b> 41 (100), 55 (93), 69 (88), 83 (74), 39 (63), 57 (59), 42 (56), 70 (27), 43 (27), 56 (24)        |
| 11 | ocimene-1                      | 23.54           | 0.720            | 1215             | 95                               | <b>93</b> 93 (100), 91 (57), 92 (42), 79 (39), 77 (37), 41 (18), 105 (17), 80 (15), 39 (15), 55 (12)       |
| 12 | ocimene-2                      | 24.21           | 0.741            | 1234             | 95                               | <b>93</b> 93 (100), 91 (72), 79 (52), 77 (40), 80 (36), 92 (29), 105 (23), 41 (22), 39 (16), 121 (16)      |
| 13 | <i>n</i> -hexyl acetate        | 24.85           | 0.760            | 1251             | 93                               | <b>43</b> 43 (100), 56 (60), 61 (31), 55 (30), 69 (26), 41 (23), 42 (21), 84 (21), 73 (11)                 |
| 14 | isohexanol                     | 25.95           | 0.794            | 1281             | 91                               | <b>56</b> 56 (100), 41 (62), 69 (51), 43 (45), 42 (36), 55 (24), 57 (21), 39 (15)                          |
| 15 | 3-methyl-1-pentanol            | 26.43           | 0.809            | 1294             | 92                               | <b>56</b> 56 (100), 69 (74), 55 (68), 41 (52), 43 (50), 57 (26), 39 (15), 42 (15), 84 (13), 83 (12)        |
| 16 | 2-hexenyl acetate              | 26.92           | 0.823            | 1307             | 87                               | <b>67</b> 43 (100), 67 (61), 82 (37), 41 (35), 55 (31), 57 (27), 39 (22), 100 (21), 83 (17), 56 (14)       |
| 17 | 6-methyl-5-hepten-2-one        | 27.19           | 0.832            | 1315             | 85                               | <b>108</b> 43 (100), 41 (61), 69 (61), 55 (53), 108 (52), 111 (29), 83 (27), 71 (27), 67 (26), 93 (22)     |
| 18 | 1-hexanol                      | 27.32           | 0.836            | 1319             | 97                               | <b>56</b> 56 (100), 55 (56), 43 (47), 41 (40), 69 (37), 42 (33), 39 (12)                                   |
| 19 | <i>E</i> -3-eicosene           | 27.49           | 0.841            | 1324             | 86                               | <b>111</b> 69 (100), 43 (70), 57 (64), 55 (52), 83 (51), 85 (48), 41 (45), 84 (44), 111 (42), 71 (42)      |
| 20 | 2-methyl-1-decanol             | 27.80           | 0.850            | 1333             | 86                               | <b>85</b> 69 (100), 43 (82), 57 (71), 55 (55), 85 (52), 41 (47), 71 (46), 83 (45), 84 (43), 111 (42)       |
| 21 | Z-3-hexenol                    | 28.47           | 0.871            | 1352             | 89                               | <b>67</b> 67 (100), 41 (81), 82 (44), 55 (38), 39 (27), 69 (23), 42 (20), 57 (15), 54 (13), 53 (12)        |
| 22 | allo-ocimene                   | 28.60           | 0.875            | 1355             | 91                               | <b>121</b> 121 (100), 105 (56), 136 (42), 79 (38), 91 (36), 77 (28), 41 (27), 93 (24), 119 (13), 39 (13)   |
| 23 | <i>p</i> -cymene               | 28.65           | 0.876            | 1357             | 91                               | <b>134</b> 119 (100), 91 (33), 134 (30), 121 (22), 105 (21), 57 (16), 41 (16), 77 (14), 71 (14), 43 (11)   |
| 24 | 2-hexenol                      | 29.14           | 0.891            | 1371             | 88                               | <b>57</b> 57 (100), 41 (36), 82 (23), 67 (21), 39 (16), 43 (16), 44 (14), 55 (12), 71 (12), 56 (11)        |
| 25 | nonaldehyde                    | 29.39           | 0.899            | 1378             | 96                               | <b>41</b> 57 (100), 41 (84), 56 (61), 43 (54), 55 (50), 44 (46), 70 (45), 69 (36), 68 (35), 81 (35)        |
| 26 | acetic acid                    | 30.42           | 0.931            | 1408             | 94                               | <b>60</b> 43 (100), 45 (86), 60 (71), 42 (18), 83 (15), 55 (12), 41 (12), 57 (11), 97 (11)                 |
| 27 | 1-octen-3-ol                   | 30.61           | 0.936            | 1413             | 93                               | <b>57</b> 57 (100), 43 (25), 41 (23), 55 (23), 72 (16), 85 (12), 39 (12)                                   |
| 28 | 1,3-ditertiarybutylbenzene     | 30.75           | 0.941            | 1418             | 86                               | <b>175</b> 175 (100), 57 (34), 190 (15), 176 (14)                                                          |
| 29 | linalool oxide                 | 31.04           | 0.950            | 1426             | 88                               | <b>59</b> 59 (100), 94 (79), 93 (74), 43 (54), 67 (52), 55 (52), 111 (51), 68 (47), 81 (32), 79 (31)       |
| 30 | benzaldehyde                   | 33.71           | 1.031            | 1507             | 89                               | <b>106</b> 105 (100), 77 (89), 106 (87), 51 (34), 50 (21), 78 (16)                                         |
| 31 | L-linalool                     | 33.88           | 1.036            | 1512             | 86                               | <b>71</b> 71 (100), 93 (91), 55 (78), 43 (69), 41 (66), 69 (62), 80 (58), 121 (42), 67 (39), 92 (34)       |
| 32 | 1-octanol                      | 34.21           | 1.046            | 1522             | 85                               | <b>56</b> 56 (100), 55 (99), 41 (75), 69 (68), 70 (63), 43 (52), 83 (50), 42 (46), 84 (41), 57 (36)        |
| 33 | lilac aldehyde A               | 34.32           | 1.050            | 1526             | 96                               | <b>55</b> 55 (100), 43 (67), 93 (62), 67 (52), 111 (44), 71 (42), 41 (40), 69 (32), 81 (32), 110 (31)      |
| 34 | lilac aldehyde B               | 34.84           | 1.066            | 1542             | 94                               | <b>55</b> 55 (100), 93 (68), 43 (61), 67 (54), 71 (53), 111 (43), 41 (42), 69 (36), 81 (30), 68 (28)       |
| 35 | lilac aldehyde C               | 35.06           | 1.072            | 1549             | 96                               | <b>55</b> 55 (100), 93 (64), 43 (53), 67 (48), 111 (43), 41 (38), 71 (35), 69 (31), 81 (29), 153 (29)      |
| 36 | hotrienol                      | 35.80           | 1.095            | 1573             | 88                               | <b>82</b> 71 (100), 82 (67), 43 (43), 67 (39), 41 (14), 55 (11)                                            |
| 37 | lilac aldehyde D               | 35.88           | 1.098            | 1575             | 89                               | <b>93</b> 55 (100), 93 (54), 43 (49), 71 (47), 67 (42), 41 (35), 111 (31), 69 (29), 153 (26), 68 (23)      |
| 38 | $\beta$ -cyclocitral           | 37.20           | 1.138            | 1618             | 86                               | <b>137</b> 137 (100), 152 (89), 109 (86), 81 (77), 123 (77), 67 (76), 41 (50), 91 (48), 79 (46), 43 (46)   |
| 39 | phenylacetaldehyde             | 37.36           | 1.143            | 1623             | 85                               | <b>91</b> 91 (100), 55 (34), 56 (34), 70 (29), 41 (28), 69 (25), 92 (25), 43 (23), 65 (19), 120 (18)       |
| 40 | 2-methylbutrate                | 37.48           | 1.147            | 1627             | 85                               | <b>57</b> 74 (100), 91 (87), 57 (42), 41 (41), 87 (26), 92 (26), 73 (21), 65 (19), 39 (18), 120 (17)       |
| 41 | <i>p</i> -methylbenzaldehyde   | 37.76           | 1.155            | 1636             | 86                               | <b>119</b> 91 (100), 119 (84), 120 (79), 65 (26), 105 (13), 39 (12), 63 (11), 89 (11), 92 (11), 77 (10)    |
| 42 | Z-3-hexenyl angelate           | 38.13           | 1.166            | 1649             | 91                               | <b>67</b> 67 (100), 82 (92), 83 (87), 55 (71), 41 (19), 39 (17), 81 (11), 53 (11), 101 (10)                |
| 43 | salicylic aldehyde             | 38.58           | 1.180            | 1664             | 89                               | <b>122</b> 122 (100), 121 (94), 65 (31), 93 (25), 45 (23), 39 (20), 76 (18), 104 (12), 40 (11), 91 (11)    |
| 44 | 4-oxoisophorone                | 39.05           | 1.195            | 1679             | 86                               | <b>68</b> 68 (100), 96 (80), 152 (33), 39 (27), 40 (26), 109 (15), 41 (13)                                 |
| 45 | lilac alcohol A                | 39.87           | 1.220            | 1707             | 89                               | <b>93</b> 93 (100), 111 (98), 55 (74), 67 (50), 43 (49), 71 (30), 41 (29), 81 (29), 69 (24), 91 (24)       |
| 46 | epoxylinalool                  | 39.98           | 1.223            | 1710             | 87                               | <b>67</b> 93 (100), 111 (98), 55 (74), 67 (50), 43 (49), 71 (30), 41 (29), 81 (29), 69 (24), 91 (24)       |
| 47 | lilac alcohol B                | 40.51           | 1.239            | 1729             | 94                               | <b>55</b> 93 (100), 111 (86), 55 (77), 43 (41), 41 (40), 67 (40), 91 (31), 69 (28), 81 (27), 71 (26)       |
| 48 | lilac alcohol C                | 41.49           | 1.269            | 1763             | 93                               | <b>55</b> 93 (100), 111 (92), 55 (77), 67 (53), 43 (49), 41 (32), 69 (28), 81 (28), 71 (27), 91 (23)       |
| 49 | methyl salicylate              | 41.56           | 1.271            | 1766             | 87                               | <b>120</b> 120 (100), 92 (61), 152 (47), 121 (27), 65 (17), 93 (15), 39 (13), 64 (12), 63 (11)             |
| 50 | $\beta$ -phenethyl acetate     | 42.37           | 1.296            | 1794             | 87                               | <b>104</b> 104 (100), 43 (30), 91 (19), 125 (18), 126 (15), 105 (10)                                       |
| 51 | lilac alcohol D                | 42.55           | 1.302            | 1800             | 86                               | <b>55</b> 93 (100), 111 (99), 55 (91), 67 (51), 120 (48), 43 (46), 81 (31), 41 (31), 71 (29), 92 (27)      |
| 52 | geraniol                       | 42.74           | 1.307            | 1807             | 89                               | <b>123</b> 69 (100), 41 (59), 67 (22), 68 (21), 93 (19), 45 (16), 39 (13), 43 (12), 55 (12), 123 (11)      |
| 53 | benzenemethanol                | 43.71           | 1.337            | 1843             | 98                               | <b>79</b> 79 (100), 108 (76), 77 (59), 107 (56), 51 (19), 91 (14), 78 (13)                                 |
| 54 | benzeneethanol                 | 44.79           | 1.370            | 1882             | 94                               | <b>91</b> 91 (100), 92 (62), 122 (32), 65 (22)                                                             |
| 55 | benzyl nitrile                 | 45.41           | 1.389            | 1905             | 96                               | <b>117</b> 117 (100), 90 (61), 116 (46), 89 (43), 91 (14), 63 (14), 51 (12)                                |
| 56 | 2-phenylbut-2-enal             | 45.62           | 1.396            | 1913             | 85                               | <b>117</b> 115 (100), 117 (81), 146 (56), 91 (40), 116 (34), 118 (15), 89 (14), 65 (12), 78 (12), 145 (11) |

|                 |                                            |       |       |      |    |            |                                                                                                 |
|-----------------|--------------------------------------------|-------|-------|------|----|------------|-------------------------------------------------------------------------------------------------|
| 57              | $\beta$ -lonone                            | 46.14 | 1.411 | 1933 | 85 | <b>177</b> | 45 (100), 177 (98), 43 (53), 89 (38), 59 (30), 87 (27), 73 (27), 44 (24), 91 (23), 41 (19)      |
| 58              | 2-methylphenol                             | 46.75 | 1.430 | 1956 | 89 | <b>85</b>  | 68 (100), 67 (80), 85 (69), 43 (59), 83 (53), 55 (39), 71 (39), 41 (37), 82 (34), 45 (33)       |
| 59              | <i>E</i> -nerolidol                        | 47.92 | 1.466 | 2001 | 92 | <b>69</b>  | 69 (100), 93 (67), 41 (59), 43 (51), 107 (47), 71 (41), 81 (33), 67 (30), 79 (27), 55 (25)      |
| 60              | dimethyl salicylate                        | 48.83 | 1.494 | 2037 | 91 | <b>135</b> | 135 (100), 77 (53), 133 (52), 45 (42), 166 (25), 92 (24), 105 (19), 89 (16), 137 (14), 63 (13)  |
| 61              | ethyl linalool                             | 50.58 | 1.547 | 2112 | 93 | <b>71</b>  | 71 (100), 43 (77), 45 (46), 55 (45), 87 (41), 83 (36), 41 (34), 82 (28), 69 (26), 67 (23)       |
| 62              | eugenol                                    | 51.23 | 1.567 | 2154 | 93 | <b>164</b> | 164 (100), 45 (64), 103 (44), 149 (40), 77 (36), 131 (36), 91 (34), 133 (32), 89 (31), 121 (23) |
| 63              | 8-hydroxy-6,7-dihydrolinalool              | 51.62 | 1.579 | 2180 | 91 | <b>71</b>  | 71 (100), 43 (36), 45 (34), 55 (20), 89 (15), 41 (14), 59 (12), 69 (11), 72 (11)                |
| 64              | methyl palmitate                           | 52.69 | 1.612 | 2267 | 86 | <b>74</b>  | 74 (100), 87 (64), 43 (25), 55 (23), 75 (19), 143 (17), 41 (15), 69 (15), 57 (14)               |
| 65              | 2-hydroxylinalool                          | 53.14 | 1.626 | 2307 | 85 | <b>43</b>  | 43 (100), 71 (86), 67 (79), 45 (60), 55 (40), 41 (34), 68 (30), 89 (26), 119 (25), 82 (24)      |
| 66              | 1,3-diacetylbenzene                        | 55.68 | 1.703 | 2496 | 85 | <b>147</b> | 147 (100), 91 (41), 119 (21), 162 (16), 43 (16), 76 (11), 148 (10)                              |
| ID <sup>g</sup> | 1,2-dichlorobenzene- <i>d</i> <sub>4</sub> | 32.69 | 1.000 | 1476 | 98 | <b>150</b> | 150 (100), 152 (88), 115 (75), 78 (45), 117 (28), 52 (25), 154 (25), 151 (24), 76 (22), 75 (13) |

<sup>a</sup>Retention time (min); <sup>b</sup>Relative retention time, retention time of analyte/retention time of 1,2-dichlorobenzene-*d*<sub>4</sub>; <sup>c</sup>Linear retention indices calculated against *n*-alkanes (C<sub>7</sub>-C<sub>30</sub>); <sup>d</sup>Nist library match values (100 = 100% identical to the NIST library entry); <sup>e</sup>quantification ion (*m/z*), Specific mass ion used for quantification; <sup>f</sup>Lists of the representative ion peaks which intensity relatively more than 10% of biggest peak; <sup>g</sup>Internal standard.

**Table S2.** Classification and odor note of the detected volatile components identified from the flowers in five variants of *Abeliophyllum distichum* using HS-SPME-GC/MS analysis

| No | Compound                      | Retention time | Classification           | Odor note                                                                                |
|----|-------------------------------|----------------|--------------------------|------------------------------------------------------------------------------------------|
| 1  | linalool oxide                | 31.04          | Oxygenated monoterpenes  | flower <sup>a</sup>                                                                      |
| 2  | L-linalool                    | 33.88          | Oxygenated monoterpenes  | lemon, orange, citrus, floral, sweet, bois de rose, woody, green, blueberry <sup>b</sup> |
| 3  | lilac aldehyde A              | 34.32          | Oxygenated monoterpenes  | flowery, fresh <sup>b</sup>                                                              |
| 4  | lilac aldehyde B              | 34.84          | Oxygenated monoterpenes  | flowery, fresh <sup>b</sup>                                                              |
| 5  | lilac aldehyde C              | 35.06          | Oxygenated monoterpenes  | sweet, flowery <sup>b</sup>                                                              |
| 6  | hotrienol                     | 35.80          | Oxygenated monoterpenes  | sweet, tropical, floral, fennel, ginger, spicy <sup>b</sup>                              |
| 7  | lilac aldehyde D              | 35.88          | Oxygenated monoterpenes  | sweet, flowery <sup>b</sup>                                                              |
| 8  | $\beta$ -cyclocitral          | 37.20          | Oxygenated monoterpenes  | tropical, saffron, herbal, clean, rose, sweet, tobacco, green, fruity <sup>b</sup>       |
| 9  | lilac alcohol A               | 39.87          | Oxygenated monoterpenes  | flowery, fresh <sup>b</sup>                                                              |
| 10 | epoxylinalool                 | 39.98          | Oxygenated monoterpenes  | flower <sup>a</sup>                                                                      |
| 11 | lilac alcohol B               | 40.51          | Oxygenated monoterpenes  | flowery, fresh <sup>b</sup>                                                              |
| 12 | lilac alcohol C               | 41.49          | Oxygenated monoterpenes  | flowery, fresh <sup>b</sup>                                                              |
| 13 | lilac alcohol D               | 42.55          | Oxygenated monoterpenes  | flowery, fresh <sup>b</sup>                                                              |
| 14 | ethyl linalool                | 50.58          | Oxygenated monoterpenes  | fresh, bois de rose, herbal, wet, green, lavender, bergamot <sup>b</sup>                 |
| 15 | 8-hydroxy-6,7-dihydrolinalool | 51.62          | Oxygenated monoterpenes  | bois de rose, woody, citrus, blueberry, weedy <sup>b</sup>                               |
| 16 | 2-hydroxylinalool             | 53.14          | Oxygenated monoterpenes  | green, minty, spicy, herbal, rosemary, phenolic <sup>b</sup>                             |
| 17 | <i>E</i> -nerolidol           | 47.92          | Sesquiterpenes alcohols  | wood, flower, wax <sup>a</sup>                                                           |
| 18 | $\beta$ -myrcene              | 20.94          | Monoterpene hydrocarbons | balsamic, must, spice <sup>a</sup>                                                       |
| 19 | limonene                      | 22.62          | Monoterpene hydrocarbons | citrus, mint <sup>a</sup>                                                                |
| 20 | ocimene isomer-1              | 23.54          | Monoterpene hydrocarbons | citrus, herb, flower <sup>a</sup>                                                        |
| 21 | ocimene isomer-2              | 24.21          | Monoterpene hydrocarbons | citrus, herb, flower <sup>a</sup>                                                        |
| 22 | allo-ocimene                  | 28.60          | Monoterpene hydrocarbons | fruit, wet cloth <sup>a</sup>                                                            |
| 23 | benzaldehyde                  | 33.71          | Aromatic alcohols        | fruity <sup>b</sup>                                                                      |
| 24 | phenylacetaldehyde            | 37.36          | Aromatic alcohols        | honey, flower <sup>a</sup>                                                               |
| 25 | <i>p</i> -methylbenzaldehyde  | 37.76          | Aromatic alcohols        | fruity, cherry, phenolic <sup>b</sup>                                                    |
| 26 | salicylic aldehyde            | 38.58          | Aromatic alcohols        | medicinal, spicy, cinnamon, wintergreen, cooling <sup>b</sup>                            |
| 27 | methyl salicylate             | 41.56          | Aromatic alcohols        | peppermint <sup>a</sup>                                                                  |
| 28 | $\beta$ -phenethyl acetate    | 42.37          | Aromatic alcohols        | rose, honey, tobacco <sup>a</sup>                                                        |
| 29 | geraniol                      | 42.74          | Aromatic alcohols        | rose, geranium <sup>a</sup>                                                              |
| 30 | benzenemethanol               | 43.71          | Aromatic alcohols        | sweet, floral, fruity <sup>b</sup>                                                       |
| 31 | benzeneethanol                | 44.79          | Aromatic alcohols        | floral, rose, dried rose <sup>b</sup>                                                    |
| 32 | 2-phenylbut-2-enal            | 45.62          | Aromatic alcohols        | sweet, narcissus, cortex, beany, honey, cocoa, nutty, radish <sup>b</sup>                |
| 33 | dimethyl salicylate           | 48.83          | Aromatic alcohols        | wintergreen, mint <sup>a</sup>                                                           |
| 34 | eugenol                       | 51.23          | Aromatic alcohols        | clove, honey <sup>a</sup>                                                                |
| 35 | <i>p</i> -cymene              | 28.65          | Aromatics                | solvent, gasoline, citrus <sup>a</sup>                                                   |
| 36 | 1,3-ditertiarybutylbenzene    | 30.75          | Aromatics                | -                                                                                        |
| 37 | benzyl nitrile                | 45.41          | Aromatics                | -                                                                                        |
| 38 | 2-methylphenol                | 46.75          | Aromatics                | musty, phenolic, plastic, medicinal, herbal, leathery <sup>b</sup>                       |
| 39 | 1,3-diacetylbenzene           | 55.68          | Aromatics                | -                                                                                        |
| 40 | ethanol                       | 11.91          | Alcohols                 | sweet <sup>a</sup>                                                                       |
| 41 | 2-butyl-3-octanol             | 19.22          | Alcohols                 | -                                                                                        |
| 42 | isoamylalcohol                | 21.98          | Alcohols                 | pungent <sup>b</sup>                                                                     |
| 43 | <i>n</i> -hexyl acetate       | 24.85          | Alcohols                 | fruit, herb <sup>a</sup>                                                                 |
| 44 | isohexanol                    | 25.95          | Alcohols                 | resin, flower, green <sup>a</sup>                                                        |
| 45 | 3-methyl-1-pentanol           | 26.43          | Alcohols                 | pungent <sup>a</sup>                                                                     |
| 46 | 2-hexenyl acetate             | 26.92          | Alcohols                 | green, banana <sup>a</sup>                                                               |
| 47 | 1-hexanol                     | 27.32          | Alcohols                 | resin, flower, green <sup>a</sup>                                                        |
| 48 | 2-methyl-1-decanol            | 27.80          | Alcohols                 | -                                                                                        |
| 49 | Z-3-hexenol                   | 28.47          | Alcohols                 | green, cortex, privet, leafy, floral, petal, oily, earthy <sup>b</sup>                   |
| 50 | 2-hexenol                     | 29.14          | Alcohols                 | leaf, green, wine, fruit <sup>a</sup>                                                    |
| 51 | 1-octen-3-ol                  | 30.61          | Alcohols                 | soap, plastic <sup>a</sup>                                                               |
| 52 | 1-octanol                     | 34.21          | Alcohols                 | mushroom, fat <sup>a</sup>                                                               |
| 53 | isovaleraldehyde              | 11.50          | Aldehyde & Carboxyls     | ethereal, aldehydic, chocolate, peach, fatty <sup>b</sup>                                |
| 54 | <i>n</i> -hexanal             | 17.67          | Aldehyde & Carboxyls     | grass, tallow, fat <sup>a</sup>                                                          |
| 55 | 2-hexenal                     | 22.91          | Aldehyde & Carboxyls     | apple, green <sup>a</sup>                                                                |
| 56 | 6-methyl-5-hepten-2-one       | 27.19          | Aldehyde & Carboxyls     | -                                                                                        |
| 57 | nonaldehyde                   | 29.39          | Aldehyde & Carboxyls     | waxy, aldehydic, rose, fresh, orris, orange peel, fatty <sup>b</sup>                     |
| 58 | acetic acid                   | 30.42          | Aldehyde & Carboxyls     | sour <sup>a</sup>                                                                        |
| 59 | 2-methylbutrate               | 37.48          | Aldehyde & Carboxyls     | pungent, acidic, cheesy, roquefort, cheese <sup>b</sup>                                  |

|    |                                |       |                      |                                                             |
|----|--------------------------------|-------|----------------------|-------------------------------------------------------------|
| 60 | Z-3-hexenyl angelate           | 38.13 | Aldehyde & Carboxyls | green, floral, gardenia, jasmin <sup>b</sup>                |
| 61 | 4-oxoisophorone                | 39.05 | Aldehyde & Carboxyls | musty, woody, sweet, tea, citrus, lemon, brown <sup>b</sup> |
| 62 | $\beta$ -lonone                | 46.14 | Aldehyde & Carboxyls | seaweed, violet, flower, raspberry <sup>b</sup>             |
| 63 | decane                         | 15.26 | Others               | -                                                           |
| 64 | 5-ethyl-2,2,3-trimethylheptane | 16.82 | Others               | -                                                           |
| 65 | E-3-eicosene                   | 27.49 | Others               | -                                                           |
| 66 | methyl palmitate               | 52.69 | Others               | oily, waxy, fatty, orris <sup>b</sup>                       |

<sup>a</sup>Scent database of Flavornet [1]; <sup>b</sup>Scent database of The good scents company [2]

## Reference

1. Flavornet and human odor space. Available online: <http://www.flavornet.org/flavornet.html> (accessed on 12 November 2019).
2. The good scents company. Available online: <http://www.thegoodscentscopy.com> (accessed on 12 November 2019).

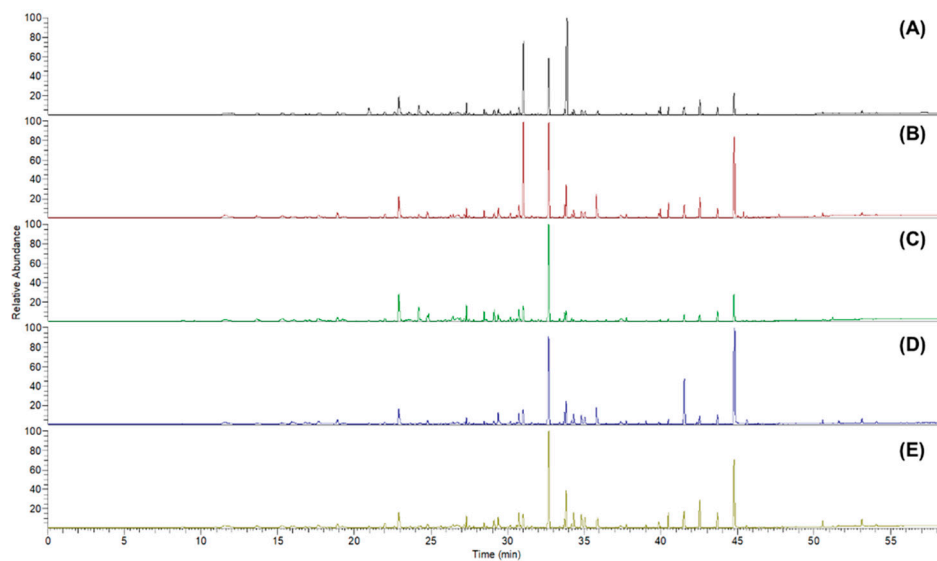

**Figure S1.** Representative total ion chromatograms (TIC) for fresh tissue of five variants of *Abeliophyllum distichum* flowers. (A) White miseon, (B) pink miseon, (C) ivory miseon, (D) blue miseon, (E) round miseon.

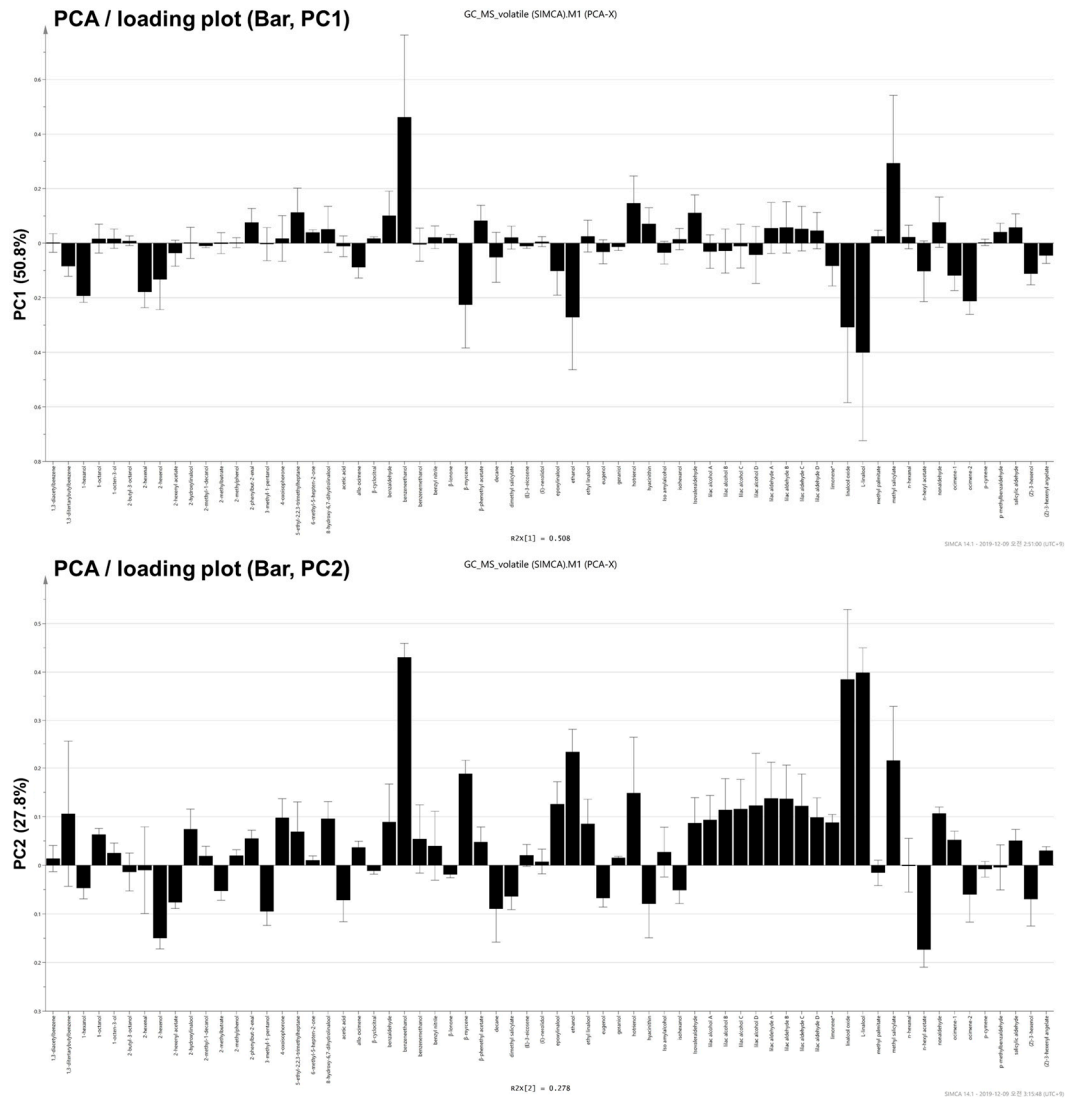

**Figure S2.** PCA score plot obtained from HS-SPME-GC/MS results on five variants of *Abeliophyllum distichum* flowers.
